# Supplementary material for: Exogenous Metabolic Modulators Improve Response to Carboplatin in Triple-Negative Breast Cancer
Source: MDPI journal article supplement (doi:10.3390/cells13100806), 2024-05-09
Supplement: s1 [file s1]

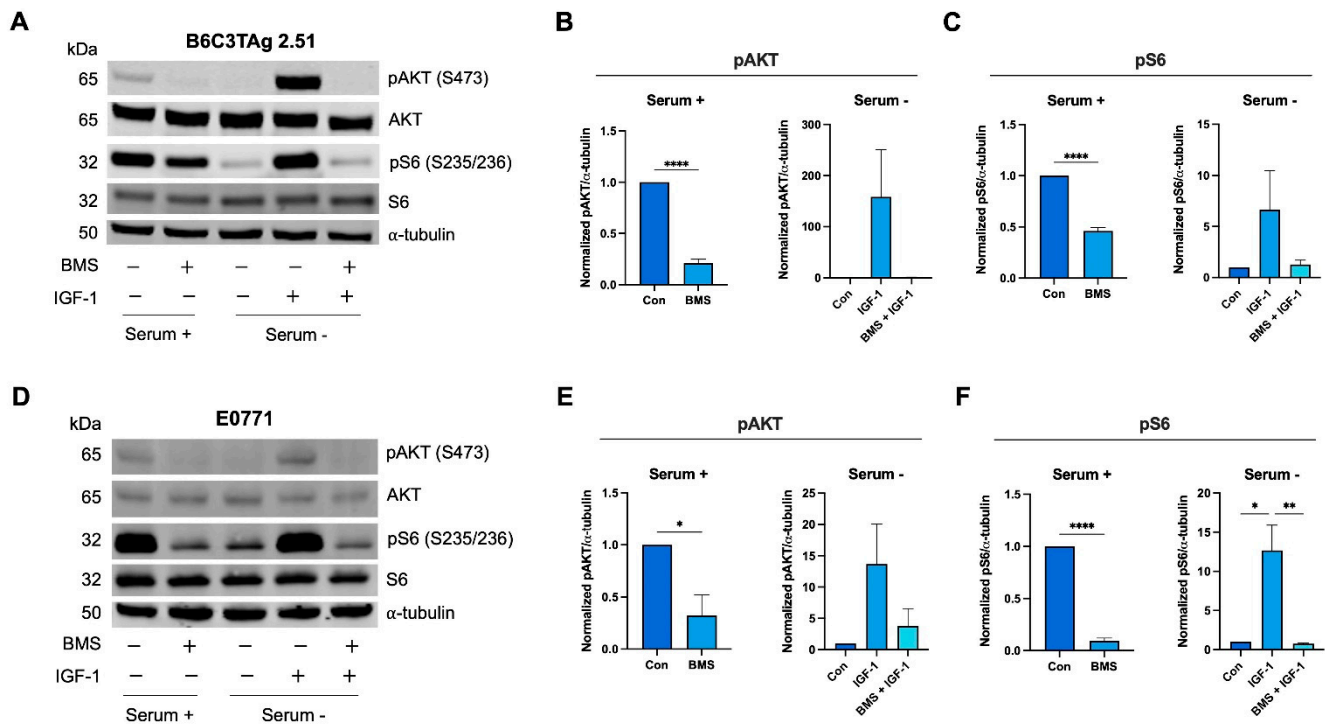

**Supplemental Figure S1.** Effect of BMS-754807 on proteins downstream of IR/IGF-1R. Representative western blots from (A) B6C3TA<sub>g</sub> 2.51 and (D) E0771 cells and quantification of (B, E) pAKT and (C, F) pS6 relative to AKT and α-tubulin or S6 and α-tubulin, respectively. Data are presented as mean ± SEM from n=3 experimental replicates. Differences between two groups were analyzed using unpaired t-test; differences across groups were analyzed using one-way ANOVA, followed by Tukey's post hoc test. Asterisks denote significance: \*P<0.05, \*\*P<0.01, \*\*\*\*P<0.0001 versus vehicle.

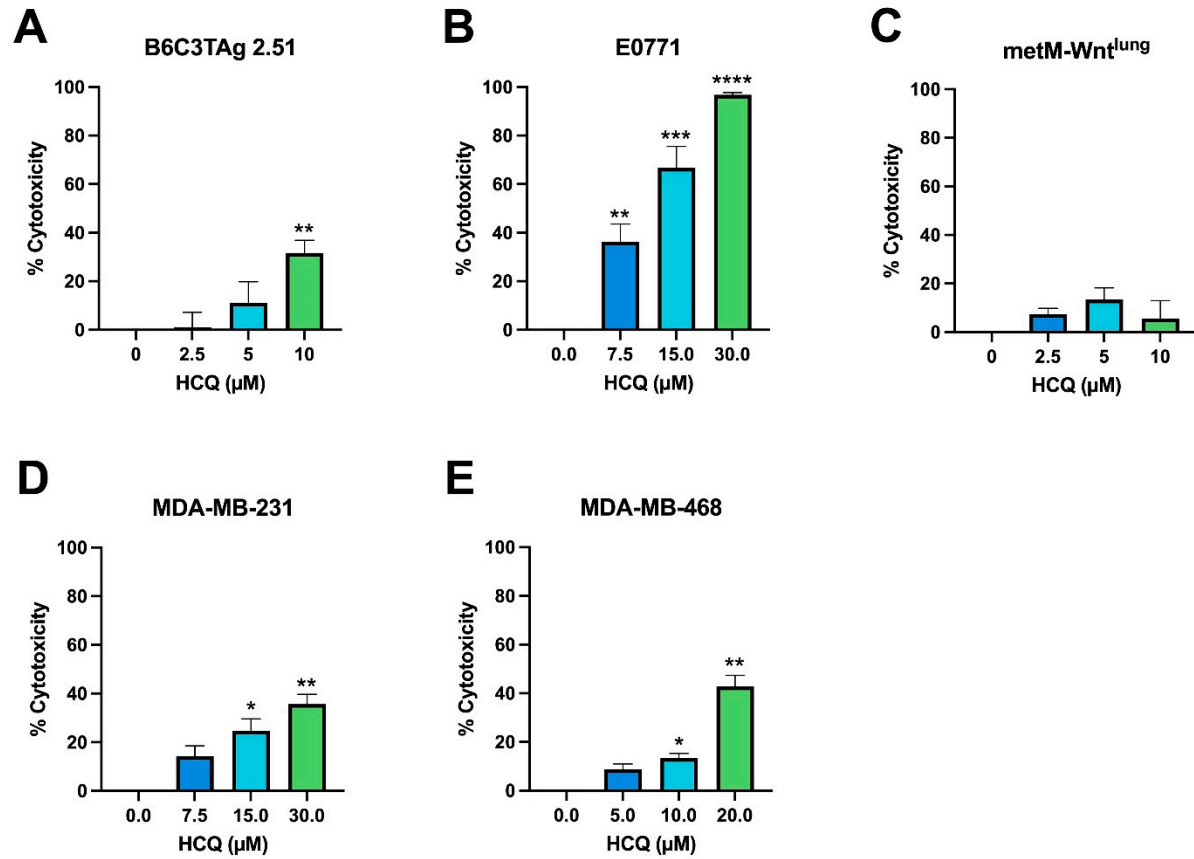

**Supplemental Figure S2. Effect of HCQ treatment on cytotoxicity in TNBC cells.** Cytotoxicity following 48h treatment with HCQ was assessed in (A) B6C3TA9 2.51; (B) E0771; (C) metM-Wnt<sup>lung</sup>; (D) MDA-MB-231; (E) MDA-MB-468 TNBC cell lines by MTT assay. Data presented as mean  $\pm$  SEM for n=3 (metM-Wnt<sup>lung</sup>), n=4 (MDA-MB-231, MDA-MB-468), n=5 (B6C3TA9 2.51), n=9 (E0771) experiments. Differences between cells exposed to more than two experimental conditions were analyzed using one-way ANOVA, followed by Dunnett's post hoc test. Asterisks denote significance: \* $P$ <0.05, \*\* $P$ <0.01, \*\*\* $P$ <0.001, \*\*\*\* $P$ <0.0001 versus vehicle.

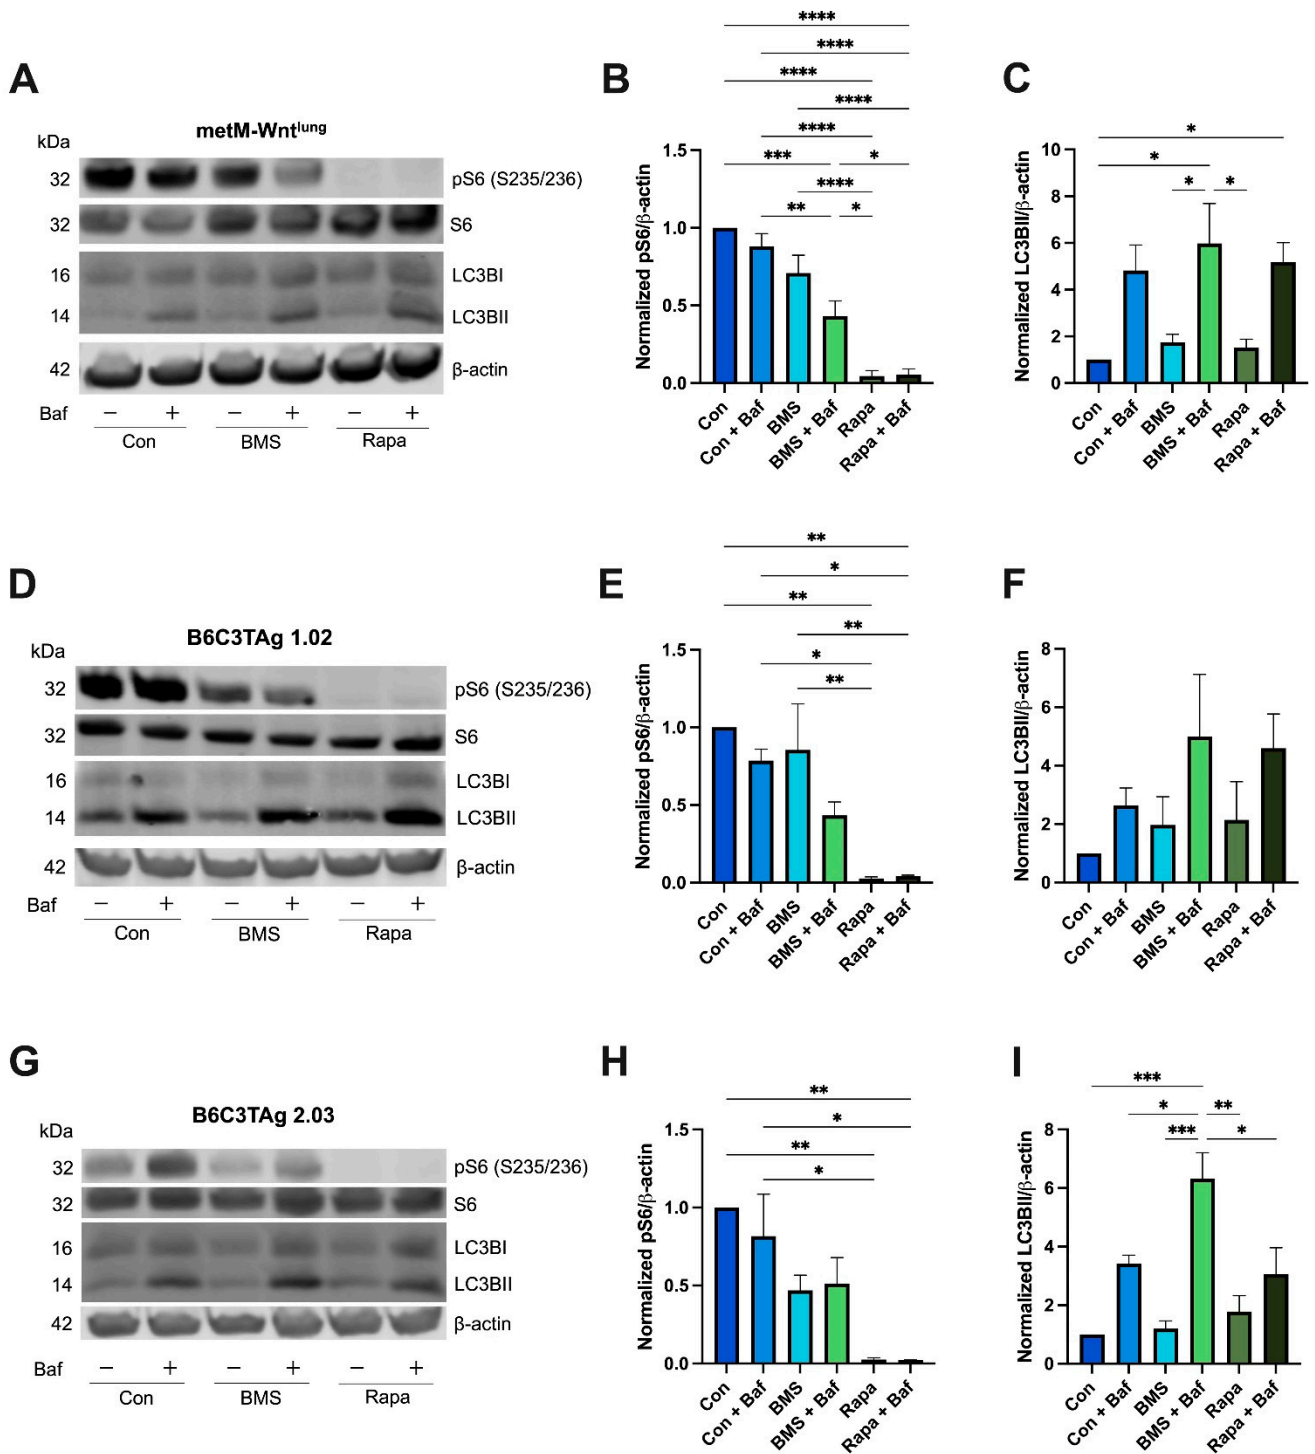

**Supplemental Figure S3. LC3 lipidation following BMS-754807 treatment.** Lipidation of LC3 (LC3-II) following 4h pretreatment with 1μM BMS-754807 or rapamycin followed by treatment with or without 200nM bafilomycin A1 (Baf) for 4h in (A-C) metM-Wnt<sup>lung</sup>; (D-F) B6C3TAg 1.02; (G-I) and 2.03. Data presented as mean ± SEM for n=4 (A-C) and n=3 (D-I) experiments. Differences between cells exposed to more than two experimental conditions were analyzed using one-way ANOVA, followed by Tukey's post hoc test. Asterisks denote significance: \**P*<0.05, \*\**P*<0.01, \*\*\**P*<0.001, \*\*\*\**P*<0.0001

**A**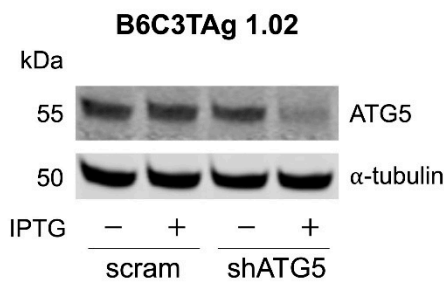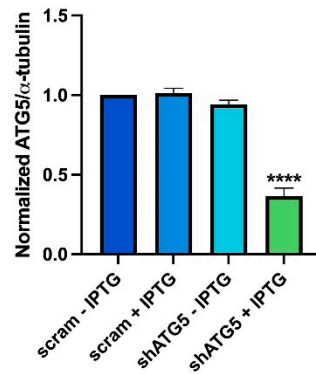**B**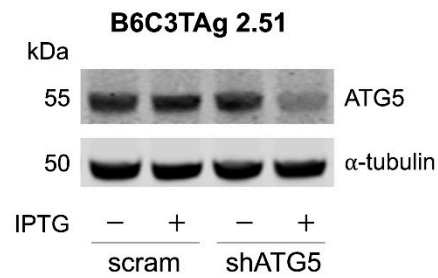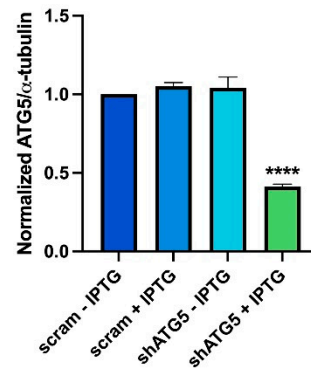**C**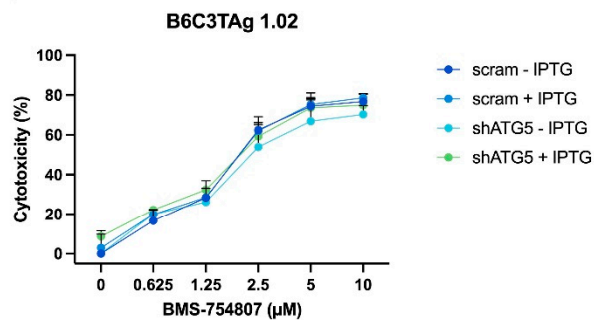**D**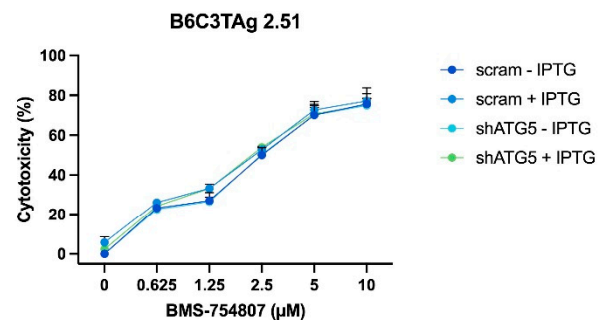**E**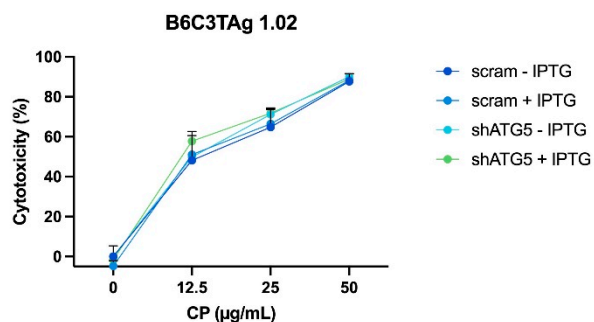**F**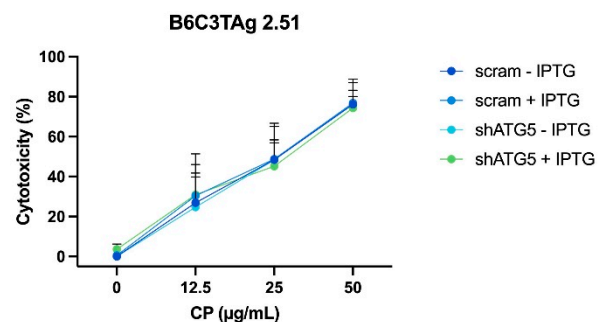

**Supplemental Figure S4. Effect of ATG5 depletion on BMS-754807 and carboplatin sensitivity.** B6C3TA<sub>g</sub> 1.02 and 2.51 cells were transduced with IPTG-inducible shRNA targeting ATG5 or a scramble control. **(A-B)** Suppression of ATG5 with 48h 1mM IPTG treatment. **(C-D)** Cytotoxicity following 48h treatment with 1mM IPTG and indicated concentrations of BMS-754807 by MTT assay. **(E-F)** Cytotoxicity following 48h treatment with 1mM IPTG and indicated concentrations of carboplatin by MTT assay. Data presented as mean  $\pm$  SEM for n=4 (A-B) and n=2 (C-F) experiments. Differences between cells exposed to more than two experimental conditions were analyzed using one-way ANOVA (A-B), followed by Dunnett's post hoc test. Asterisks denote significance: \*\*\*\* $P$ <0.0001 versus scram - IPTG.
